# Supplementary material for: On the Ionic Conductivity of Cation Exchange Membranes in Mixed Sulfates Using the Two-Phase Model
Source: MDPI journal article supplement (doi:10.3390/membranes13100811), 2023-09-26
Supplement: s1 [file s1]

Supporting information

# On the ionic conductivity of cation exchange membranes in mixed sulfates using the two-phase model

Liansheng Wu <sup>†</sup>, Haodong Jiang <sup>†</sup>, Tao Luo <sup>\*</sup> and Xinlong Wang

Ministry of Education's Research Center for Comprehensive Utilization and Clean Process Engineering of Phosphorous Resources, School of Chemical Engineering, Sichuan University, Chengdu 610065, China; liansheng\_wu@163.com (L.W.); 15310838208@163.com (H.J.); wangxl@scu.edu.cn (X.W.)

<sup>\*</sup> Correspondence: tao.luo@scu.edu.cn

<sup>†</sup> These authors contributed equally to this work.

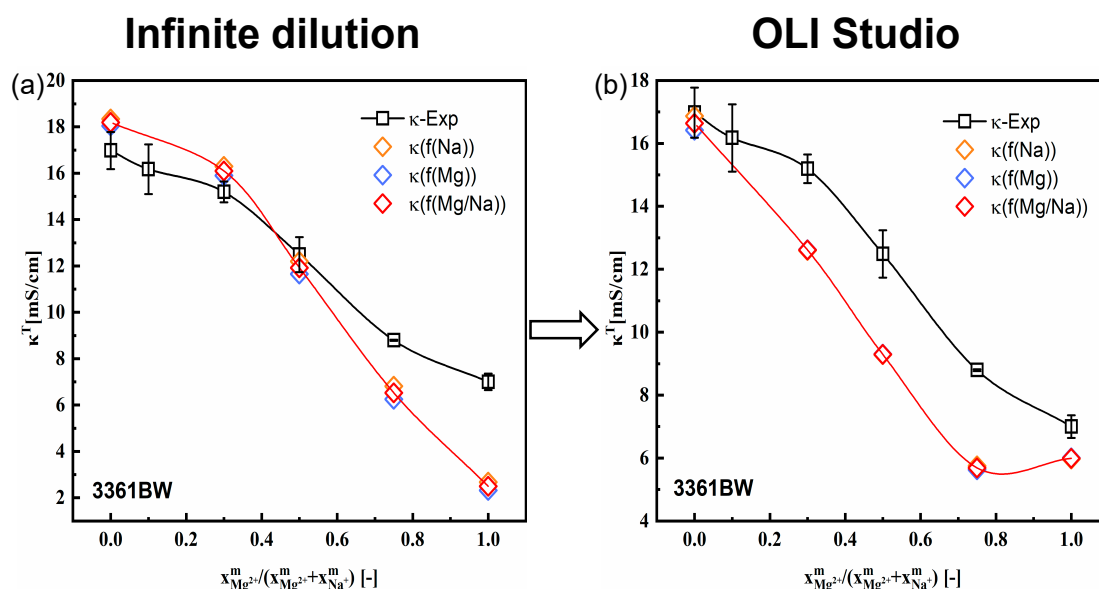

**Figure S1.** Comparison of the total conductivity variations for the 3361BW membrane in mixed  $MgSO_4+Na_2SO_4$  electrolytes as a function of the cation composition in the external solution. The inter-gel phase conductivity ( $\kappa^{in}$ ) is obtained via two different approaches: calculated with (a) the ionic mobilities in infinite dilution, (b) with the inter-gel phase conductivity data simulated in the OLI Studio.

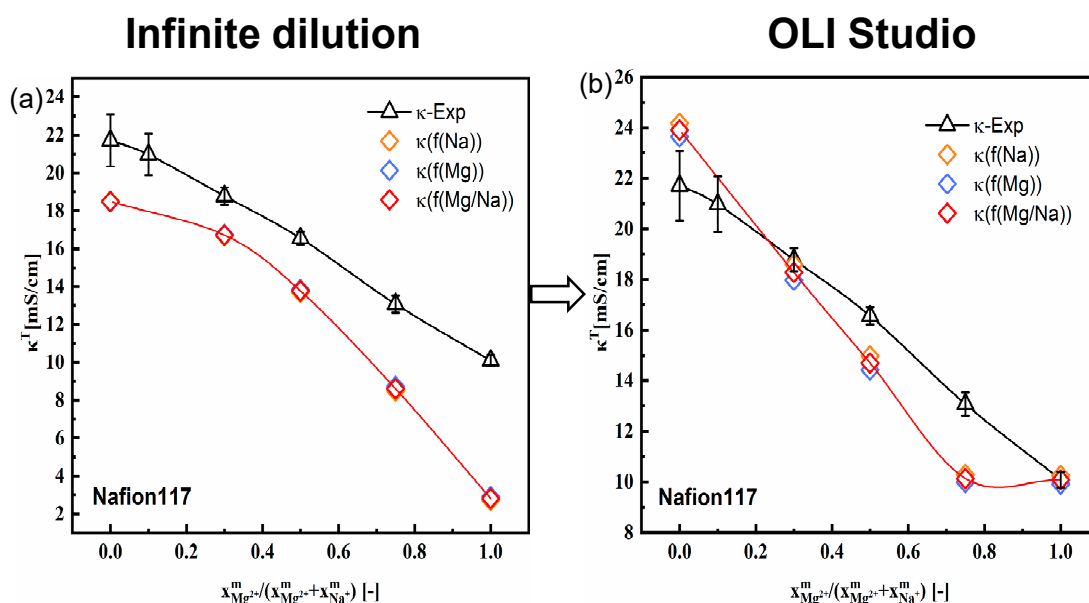

**Figure S2.** Comparison of the total conductivity variations for the Nafion117 membrane in mixed  $\text{MgSO}_4+\text{Na}_2\text{SO}_4$  electrolytes as a function of the cation composition in the external solution. The inter-gel phase conductivity ( $\kappa^{in}$ ) is obtained via two different approaches: calculated with (a) the ionic mobilities in infinite dilution, (b) with the inter-gel phase conductivity data simulated in the OLI Studio.

**Table S1 ~ Table S8** list the numerical results of the calculated total conductivity for three CEMs in equilibrium with mixed sulfates of different total sulfate concentration (0.1, 0.5, and 1.0 M) in this work.

**Table S1.** The numerical results of CEMs' total conductivity under mixed  $\text{MgSO}_4+\text{Na}_2\text{SO}_4$  electrolytes of different total sulfate concentration. The inter-gel phase conductivity ( $\kappa^{in}$ ) values are obtained from the ionic mobilities in infinite dilution.

| Membrane | SO <sub>4</sub> <sup>2-</sup> Con.<br>[M] | Equivalent Mg <sup>2+</sup> ratio in the external solution [-] | κ-total [mS cm <sup>-1</sup> ] |        |        |           |
|----------|-------------------------------------------|----------------------------------------------------------------|--------------------------------|--------|--------|-----------|
|          |                                           |                                                                | Exp.                           | f (Na) | f (Mg) | f (Mg/Na) |
| 3361BW   | 0.1                                       | 0                                                              | 12.36                          | 12.55  | 13.58  | 13.06     |
|          |                                           | 0.1                                                            | 10.23                          | -      | -      | -         |
|          |                                           | 0.3                                                            | 8.05                           | 9.48   | 10.01  | 9.74      |
|          |                                           | 0.5                                                            | 6.46                           | 6.88   | 7.05   | 6.96      |
|          |                                           | 0.75                                                           | 5.24                           | 4.60   | 4.58   | 4.59      |
|          |                                           | 1.0                                                            | 4.37                           | 1.23   | 1.30   | 1.27      |
|          | 0.5                                       | 0                                                              | 16.98                          | 18.34  | 18.04  | 18.19     |
|          |                                           | 0.1                                                            | 16.17                          | -      | -      | -         |
|          |                                           | 0.3                                                            | 15.19                          | 16.30  | 15.90  | 16.09     |
|          |                                           | 0.5                                                            | 12.49                          | 12.20  | 11.66  | 11.92     |
|          |                                           | 0.75                                                           | 8.79                           | 6.81   | 6.25   | 6.53      |
|          |                                           | 1.0                                                            | 7.00                           | 2.68   | 2.32   | 2.49      |
|          | 1.0                                       | 0                                                              | 20.74                          | 21.25  | 20.14  | 20.69     |
|          |                                           | 0.1                                                            | 18.98                          | -      | -      | -         |
|          |                                           | 0.3                                                            | 18.71                          | 20.20  | 19.03  | 19.61     |
|          |                                           | 0.5                                                            | 15.54                          | 15.55  | 14.39  | 14.96     |
|          |                                           | 0.75                                                           | 11.22                          | 8.42   | 7.52   | 7.96      |
|          |                                           | 1.0                                                            | 8.28                           | 3.12   | 2.60   | 2.85      |
| Membrane | κ-total [mS cm <sup>-1</sup> ]            |                                                                |                                |        |        |           |

| Membrane  | SO <sub>4</sub> <sup>2-</sup> Con.<br>[M] | Equivalent Mg <sup>2+</sup> ratio in the external solution [-] | Exp.   | $\kappa$ -total [mS cm <sup>-1</sup> ] |        |           |
|-----------|-------------------------------------------|----------------------------------------------------------------|--------|----------------------------------------|--------|-----------|
|           |                                           |                                                                |        | f (Na)                                 | f (Mg) | f (Mg/Na) |
| CSE       | 0.1                                       | 0                                                              | 12.36  | 8.32                                   | 8.89   | 8.60      |
|           |                                           | 0.1                                                            | 10.23  | 9.26                                   | 10.17  | 9.71      |
|           |                                           | 0.3                                                            | 8.053  | 11.67                                  | 12.65  | 12.15     |
|           |                                           | 0.5                                                            | 6.46   | 12.30                                  | 13.56  | 12.91     |
|           |                                           | 0.75                                                           | 5.24   | 13.07                                  | 14.50  | 13.77     |
|           |                                           | 1.0                                                            | 4.37   | 10.99                                  | 13.36  | 12.12     |
|           | 0.5                                       | 0                                                              | 16.98  | 9.96                                   | 9.97   | 9.97      |
|           |                                           | 0.1                                                            | 16.17  | 10.18                                  | 10.12  | 10.15     |
|           |                                           | 0.3                                                            | 15.19  | 11.83                                  | 11.82  | 11.82     |
|           |                                           | 0.5                                                            | 12.49  | 13.73                                  | 13.85  | 13.79     |
|           |                                           | 0.75                                                           | 8.79   | 15.56                                  | 15.89  | 15.72     |
|           |                                           | 1.0                                                            | 7.00   | 16.60                                  | 17.39  | 16.99     |
|           | 1.0                                       | 0                                                              | 20.74  | 11.15                                  | 10.72  | 10.93     |
|           |                                           | 0.1                                                            | 18.98  | 11.63                                  | 11.09  | 11.35     |
|           |                                           | 0.3                                                            | 18.71  | 12.95                                  | 12.46  | 12.70     |
|           |                                           | 0.5                                                            | 15.54  | 14.66                                  | 14.24  | 14.45     |
|           |                                           | 0.75                                                           | 11.22  | 16.92                                  | 16.66  | 16.79     |
|           |                                           | 1.0                                                            | 8.28   | 19.20                                  | 19.09  | 19.15     |
| Nafion117 | 0.1                                       | 0                                                              | 12.36  | 14.64                                  | 13.69  | 14.16     |
|           |                                           | 0.1                                                            | 10.23  | 13.31                                  | 12.59  | 12.94     |
|           |                                           | 0.3                                                            | 8.053  | 10.38                                  | 9.96   | 10.17     |
|           |                                           | 0.5                                                            | 6.46   | 7.97                                   | 7.77   | 7.87      |
|           |                                           | 0.75                                                           | 5.24   | 5.23                                   | 5.20   | 5.21      |
|           |                                           | 1.0                                                            | 4.36   | 2.29                                   | 2.329  | 2.309     |
|           | 0.5                                       | 0                                                              | 16.98  | 18.51                                  | 18.48  | 18.498    |
|           |                                           | 0.1                                                            | 16.178 | -                                      | -      | -         |
|           |                                           | 0.3                                                            | 15.19  | 16.69                                  | 16.74  | 16.72     |
|           |                                           | 0.5                                                            | 12.48  | 13.71                                  | 13.84  | 13.78     |
|           |                                           | 0.75                                                           | 8.79   | 8.48                                   | 8.72   | 8.60      |
|           |                                           | 1.0                                                            | 7.00   | 2.72                                   | 2.90   | 2.81      |
|           | 1.0                                       | 0                                                              | 20.74  | 20.08                                  | 20.51  | 20.29     |
|           |                                           | 0.1                                                            | 18.98  | 19.56                                  | 19.99  | 19.77     |
|           |                                           | 0.3                                                            | 18.71  | 17.57                                  | 17.97  | 17.77     |
|           |                                           | 0.5                                                            | 15.54  | 14.81                                  | 15.23  | 15.02     |
|           |                                           | 0.75                                                           | 11.22  | 9.37                                   | 9.77   | 9.57      |
|           |                                           | 1.0                                                            | 8.28   | 2.89                                   | 3.13   | 3.01      |

**Table S2.** The numerical results of CEMs' total conductivity under mixed H<sub>2</sub>SO<sub>4</sub> + Na<sub>2</sub>SO<sub>4</sub> electrolytes of different total sulfate concentration. The inter-gel phase conductivity ( $\kappa^{in}$ ) values are obtained from the ionic mobilities in infinite dilution.

| Membrane | SO <sub>4</sub> <sup>2-</sup> Con.<br>[M] | Equivalent H <sup>+</sup> ratio in the external solution [-] | $\kappa$ -total [mS cm <sup>-1</sup> ] |       |       |         |
|----------|-------------------------------------------|--------------------------------------------------------------|----------------------------------------|-------|-------|---------|
|          |                                           |                                                              | Exp.                                   | f(Na) | f(H)  | f(H/Na) |
| 3361BW   | 0.1                                       | 0                                                            | 12.56                                  | 13.11 | 10.20 | 11.56   |
|          |                                           | 0.1                                                          | 13.89                                  | -     | -     | -       |
|          |                                           | 0.3                                                          | 16.54                                  | 16.18 | 13.77 | 14.93   |
|          |                                           | 0.5                                                          | 22.15                                  | 29.59 | 22.69 | 25.91   |
|          |                                           | 0.75                                                         | 30.22                                  | 46.78 | 30.02 | 37.48   |

|           |                                           | 1.0                                                          | 45.75                                  | 94.01  | 60.61  | 75.48   |
|-----------|-------------------------------------------|--------------------------------------------------------------|----------------------------------------|--------|--------|---------|
|           |                                           | 0                                                            | 14.21                                  | 17.11  | 16.88  | 16.99   |
|           |                                           | 0.1                                                          | 18.68                                  | -      | -      | -       |
|           | 0.5                                       | 0.3                                                          | 23.04                                  | 22.06  | 22.10  | 22.08   |
|           |                                           | 0.5                                                          | 27.33                                  | 37.80  | 33.42  | 35.54   |
|           |                                           | 0.75                                                         | 53.77                                  | 61.78  | 55.44  | 58.53   |
|           |                                           | 1.0                                                          | 98.20                                  | 126.94 | 106.97 | 116.52  |
|           |                                           | 0                                                            | 15.15                                  | 21.21  | 25.36  | 23.19   |
|           |                                           | 0.1                                                          | 21.18                                  | -      | -      | -       |
|           | 1.0                                       | 0.3                                                          | 26.10                                  | -      | -      | -       |
|           |                                           | 0.5                                                          | 33.60                                  | 39.75  | 42.64  | 41.17   |
|           |                                           | 0.75                                                         | 60.40                                  | 77.44  | 76.18  | 76.80   |
|           |                                           | 1.0                                                          | 116.86                                 | 147.32 | 141.78 | 144.52  |
| Membrane  | SO <sub>4</sub> <sup>2-</sup> Con.<br>[M] | Equivalent H <sup>+</sup> ratio in the external solution [-] | $\kappa$ -total [mS cm <sup>-1</sup> ] |        |        |         |
|           |                                           |                                                              | Exp.                                   | f(Na)  | f(H)   | f(H/Na) |
| CSE       | 0.1                                       | 0                                                            | 12.56                                  | 7.60   | 7.64   | 7.62    |
|           |                                           | 0.1                                                          | 13.89                                  | 11.33  | 11.37  | 11.35   |
|           |                                           | 0.3                                                          | 16.54                                  | 13.81  | 13.88  | 13.85   |
|           |                                           | 0.5                                                          | 22.15                                  | 19.37  | 19.48  | 19.42   |
|           |                                           | 0.75                                                         | 30.22                                  | 33.95  | 34.08  | 34.02   |
|           |                                           | 1.0                                                          | 45.75                                  | 45.52  | 45.87  | 45.69   |
|           | 0.5                                       | 0                                                            | 14.21                                  | 10.42  | 10.41  | 10.41   |
|           |                                           | 0.1                                                          | 18.68                                  | 16.62  | 16.61  | 16.61   |
|           |                                           | 0.3                                                          | 23.04                                  | 19.34  | 19.33  | 19.34   |
|           |                                           | 0.5                                                          | 27.33                                  | 23.46  | 23.50  | 23.48   |
|           |                                           | 0.75                                                         | 53.77                                  | 33.47  | 33.49  | 33.48   |
|           |                                           | 1.0                                                          | 98.20                                  | 57.77  | 57.94  | 57.86   |
|           | 1.0                                       | 0                                                            | 15.15                                  | 10.82  | 10.81  | 10.81   |
|           |                                           | 0.1                                                          | 21.18                                  | 13.64  | 13.62  | 13.63   |
|           |                                           | 0.3                                                          | 26.10                                  | 17.82  | 17.80  | 17.81   |
|           |                                           | 0.5                                                          | 33.60                                  | 25.36  | 25.34  | 25.35   |
|           |                                           | 0.75                                                         | 60.40                                  | 40.49  | 40.50  | 40.49   |
|           |                                           | 1.0                                                          | 116.86                                 | 72.06  | 71.97  | 72.02   |
| Membrane  | SO <sub>4</sub> <sup>2-</sup> Con.<br>[M] | Equivalent H <sup>+</sup> ratio in the external solution [-] | $\kappa$ -total [mS cm <sup>-1</sup> ] |        |        |         |
|           |                                           |                                                              | Exp.                                   | f(Na)  | f(H)   | f(H/Na) |
| Nafion117 | 0.1                                       | 0                                                            | 12.56                                  | 14.17  | 15.26  | 14.71   |
|           |                                           | 0.1                                                          | 13.89                                  | 27.21  | 29.29  | 28.23   |
|           |                                           | 0.3                                                          | 16.54                                  | 31.77  | 34.29  | 33.01   |
|           |                                           | 0.5                                                          | 22.15                                  | 34.28  | 37.29  | 35.75   |
|           |                                           | 0.75                                                         | 30.22                                  | 45.94  | 49.77  | 47.82   |
|           |                                           | 1.0                                                          | 45.75                                  | 61.95  | 67.09  | 64.47   |
|           | 0.5                                       | 0                                                            | 14.21                                  | 17.96  | 17.96  | 17.96   |
|           |                                           | 0.1                                                          | 18.68                                  | 30.44  | 31.81  | 31.12   |
|           |                                           | 0.3                                                          | 23.04                                  | 36.73  | 37.32  | 37.02   |
|           |                                           | 0.5                                                          | 27.33                                  | 43.99  | 44.62  | 44.30   |
|           |                                           | 0.75                                                         | 53.77                                  | 56.28  | 57.41  | 56.84   |
|           |                                           | 1.0                                                          | 98.20                                  | 72.34  | 74.66  | 73.49   |
|           | 1.0                                       | 0                                                            | 15.15                                  | 19.51  | 19.01  | 19.26   |
|           |                                           | 0.1                                                          | 21.18                                  | 31.01  | 30.48  | 30.74   |
|           |                                           | 0.3                                                          | 26.10                                  | 39.39  | 38.48  | 38.94   |
|           |                                           | 0.5                                                          | 33.60                                  | 38.83  | 37.75  | 38.29   |
|           |                                           | 0.75                                                         | 60.40                                  | 58.87  | 57.03  | 57.94   |
|           |                                           | 1.0                                                          | 116.86                                 | 86.33  | 84.33  | 85.32   |

**Table S3.** The numerical results of CEMs' total conductivity under mixed  $\text{MgSO}_4 + \text{Na}_2\text{SO}_4$  electrolytes of different total sulfate concentration. The inter-gel phase conductivity ( $\kappa^{\text{in}}$ ) values are simply equivalent to the conductivity of the external solution ( $\kappa^{\text{e}}$ ).

| Membrane  | $\text{SO}_4^{2-}$ Con. [M] | Equivalent $\text{Mg}^{2+}$ ratio in the external solution [-] | $\kappa$ -total [ $\text{mS cm}^{-1}$ ] |       |       |          |
|-----------|-----------------------------|----------------------------------------------------------------|-----------------------------------------|-------|-------|----------|
|           |                             |                                                                | Exp.                                    | f(Na) | f(Mg) | f(Mg/Na) |
| 3361BW    | 0.1                         | 0                                                              | 12.36                                   | 16.91 | 16.79 | 16.85    |
|           |                             | 0.1                                                            | 10.23                                   | 13.74 | 14.04 | 13.88    |
|           |                             | 0.3                                                            | 8.05                                    | 10.48 | 11.01 | 10.74    |
|           |                             | 0.5                                                            | 6.46                                    | 7.90  | 8.57  | 8.23     |
|           |                             | 0.75                                                           | 5.24                                    | 7.02  | 7.62  | 7.31     |
|           |                             | 1.0                                                            | 4.37                                    | 8.57  | 8.82  | 8.70     |
|           | 0.5                         | 0                                                              | 16.98                                   | 23.44 | 28.06 | 25.65    |
|           |                             | 0.1                                                            | 16.17                                   | -     | -     | -        |
|           |                             | 0.3                                                            | 15.19                                   | 19.10 | 22.89 | 20.91    |
|           |                             | 0.5                                                            | 12.49                                   | 14.77 | 18.06 | 16.33    |
|           |                             | 0.75                                                           | 8.79                                    | 9.70  | 12.56 | 11.03    |
|           |                             | 1.0                                                            | 7.00                                    | 10.31 | 13.01 | 11.58    |
|           | 1.0                         | 0                                                              | 20.74                                   | 29.92 | 37.37 | 33.44    |
|           |                             | 0.1                                                            | 18.98                                   | -     | -     | -        |
|           |                             | 0.3                                                            | 18.71                                   | 24.72 | 31.08 | 27.72    |
|           |                             | 0.5                                                            | 15.54                                   | 19.39 | 24.86 | 21.96    |
|           |                             | 0.75                                                           | 11.22                                   | 13.07 | 17.60 | 15.17    |
|           |                             | 1.0                                                            | 8.28                                    | 12.70 | 16.73 | 14.58    |
| CSE       | 0.1                         | 0                                                              | 12.36                                   | 11.57 | 11.81 | 11.69    |
|           |                             | 0.1                                                            | 10.23                                   | 8.28  | 8.59  | 8.44     |
|           |                             | 0.3                                                            | 8.05                                    | 4.89  | 5.19  | 5.04     |
|           |                             | 0.5                                                            | 6.46                                    | 3.74  | 4.01  | 3.87     |
|           |                             | 0.75                                                           | 5.24                                    | 3.42  | 3.66  | 3.54     |
|           |                             | 1.0                                                            | 4.37                                    | 3.96  | 4.18  | 4.07     |
|           | 0.5                         | 0                                                              | 16.98                                   | 15.39 | 16.66 | 16.02    |
|           |                             | 0.1                                                            | 16.17                                   | 13.45 | 14.62 | 14.03    |
|           |                             | 0.3                                                            | 15.19                                   | 9.58  | 10.54 | 10.05    |
|           |                             | 0.5                                                            | 12.49                                   | 6.77  | 7.53  | 7.14     |
|           |                             | 0.75                                                           | 8.79                                    | 4.36  | 4.94  | 4.64     |
|           |                             | 1.0                                                            | 7.00                                    | 4.58  | 5.16  | 4.86     |
|           | 1.0                         | 0                                                              | 20.74                                   | 17.32 | 19.13 | 18.20    |
|           |                             | 0.1                                                            | 18.98                                   | 14.11 | 15.73 | 14.90    |
|           |                             | 0.3                                                            | 18.71                                   | 11.67 | 13.07 | 12.35    |
|           |                             | 0.5                                                            | 15.54                                   | 8.29  | 9.40  | 8.83     |
|           |                             | 0.75                                                           | 11.22                                   | 5.01  | 5.80  | 5.39     |
|           |                             | 1.0                                                            | 8.28                                    | 4.29  | 4.97  | 4.61     |
| Nafion117 | 0.1                         | 0                                                              | 12.36                                   | 24.83 | 24.73 | 24.78    |
|           |                             | 0.1                                                            | 10.23                                   | 20.43 | 20.38 | 20.41    |
|           |                             | 0.3                                                            | 8.05                                    | 15.29 | 15.27 | 15.28    |
|           |                             | 0.5                                                            | 6.46                                    | 12.25 | 12.25 | 12.25    |
|           |                             | 1.0                                                            | 4.37                                    | 8.57  | 8.82  | 8.70     |

|  |     |      |       |       |       |       |
|--|-----|------|-------|-------|-------|-------|
|  | 0.5 | 0.75 | 5.24  | 10.88 | 10.87 | 10.88 |
|  |     | 1.0  | 4.37  | 10.34 | 10.33 | 10.34 |
|  |     | 0    | 16.98 | 29.71 | 29.90 | 29.81 |
|  |     | 0.1  | 16.17 | -     | -     | -     |
|  |     | 0.3  | 15.19 | 23.65 | 23.81 | 23.73 |
|  |     | 0.5  | 12.49 | 19.44 | 19.58 | 19.51 |
|  |     | 0.75 | 8.79  | 13.72 | 13.85 | 13.78 |
|  | 1.0 | 1.0  | 7.00  | 13.63 | 13.74 | 13.69 |
|  |     | 0    | 20.74 | 27.00 | 27.31 | 27.16 |
|  |     | 0.1  | 18.98 | 26.11 | 26.42 | 26.26 |
|  |     | 0.3  | 18.71 | 24.08 | 24.36 | 24.22 |
|  |     | 0.5  | 15.54 | 20.64 | 20.87 | 20.76 |
|  |     | 0.75 | 11.22 | 15.77 | 15.96 | 15.86 |
|  |     | 1.0  | 8.28  | 14.44 | 14.62 | 14.53 |

**Table S4.** The numerical results of CEMs' total conductivity under mixed  $\text{H}_2\text{SO}_4 + \text{Na}_2\text{SO}_4$  electrolytes of different total sulfate concentration. The inter-gel phase conductivity ( $\kappa^{\text{in}}$ ) values are simply equivalent to the conductivity of the external solution ( $\kappa^{\text{s}}$ ).

| Membrane | $\text{SO}_4^{2-}$ Con. [M] | Equivalent $\text{H}^+$ ratio in the external solution [-] | $\kappa$ -total [ $\text{mS cm}^{-1}$ ] |        |        |         |
|----------|-----------------------------|------------------------------------------------------------|-----------------------------------------|--------|--------|---------|
|          |                             |                                                            | Exp.                                    | f(Na)  | f(H)   | f(H/Na) |
| 3361BW   | 0.1                         | 0                                                          | 12.56                                   | 17.27  | 17.04  | 17.16   |
|          |                             | 0.1                                                        | 13.89                                   | -      | -      | -       |
|          |                             | 0.3                                                        | 16.54                                   | 18.74  | 19.65  | 19.19   |
|          |                             | 0.5                                                        | 22.15                                   | 26.69  | 27.17  | 26.93   |
|          |                             | 0.75                                                       | 30.22                                   | 39.42  | 39.19  | 39.30   |
|          |                             | 1.0                                                        | 45.75                                   | 61.51  | 58.57  | 60.02   |
|          | 0.5                         | 0                                                          | 14.21                                   | 24.54  | 30.23  | 27.24   |
|          |                             | 0.1                                                        | 18.68                                   | -      | -      | -       |
|          |                             | 0.3                                                        | 23.04                                   | 34.50  | 42.63  | 38.35   |
|          |                             | 0.5                                                        | 27.33                                   | 43.44  | 53.92  | 48.40   |
|          |                             | 0.75                                                       | 53.77                                   | 80.40  | 93.97  | 86.92   |
|          |                             | 1.0                                                        | 98.20                                   | 150.64 | 163.92 | 157.14  |
|          | 1.0                         | 0                                                          | 15.15                                   | 26.33  | 35.63  | 30.63   |
|          |                             | 0.1                                                        | 21.18                                   | -      | -      | -       |
|          |                             | 0.3                                                        | 26.10                                   | 43.39  | 57.40  | 49.91   |
|          |                             | 0.5                                                        | 33.60                                   | 54.62  | 72.72  | 63.03   |
|          |                             | 0.75                                                       | 60.40                                   | 94.81  | 122.07 | 107.58  |
|          |                             | 1.0                                                        | 116.86                                  | 190.68 | 226.61 | 207.87  |
| Membrane | $\text{SO}_4^{2-}$ Con. [M] | Equivalent $\text{H}^+$ ratio in the external solution [-] | $\kappa$ -total [ $\text{mS cm}^{-1}$ ] |        |        |         |
|          |                             |                                                            | Exp.                                    | f(Na)  | f(H)   | f(H/Na) |
| CSE      | 0.1                         | 0                                                          | 12.56                                   | 12.07  | 12.56  | 12.32   |
|          |                             | 0.1                                                        | 13.89                                   | 7.77   | 8.69   | 8.21    |
|          |                             | 0.3                                                        | 16.54                                   | 14.75  | 15.61  | 15.17   |
|          |                             | 0.5                                                        | 22.15                                   | 22.51  | 23.25  | 22.88   |
|          |                             | 0.75                                                       | 30.22                                   | 29.45  | 30.51  | 29.98   |
|          |                             | 1.0                                                        | 45.75                                   | 60.69  | 59.20  | 59.94   |
|          | 0.5                         | 0                                                          | 14.21                                   | 15.50  | 18.44  | 16.91   |
|          |                             | 0.1                                                        | 18.68                                   | 12.38  | 15.43  | 13.82   |
|          |                             | 0.3                                                        | 23.04                                   | 16.39  | 20.27  | 18.23   |
|          |                             | 0.5                                                        | 27.33                                   | 28.22  | 33.59  | 30.79   |

|           |                                           | 0.75                                                         | 53.77                                  | 51.47  | 59.40  | 55.29   |
|-----------|-------------------------------------------|--------------------------------------------------------------|----------------------------------------|--------|--------|---------|
|           |                                           | 1.0                                                          | 98.20                                  | 104.43 | 114.72 | 109.45  |
|           | 1.0                                       | 0                                                            | 15.15                                  | 15.69  | 19.80  | 17.63   |
|           |                                           | 0.1                                                          | 21.18                                  | 16.31  | 20.90  | 18.46   |
|           |                                           | 0.3                                                          | 26.10                                  | 19.18  | 24.85  | 21.83   |
|           |                                           | 0.5                                                          | 33.60                                  | 27.76  | 35.45  | 31.37   |
|           |                                           | 0.75                                                         | 60.40                                  | 57.75  | 70.71  | 63.90   |
|           |                                           | 1.0                                                          | 116.86                                 | 90.91  | 110.06 | 100.03  |
| Membrane  | SO <sub>4</sub> <sup>2-</sup> Con.<br>[M] | Equivalent H <sup>+</sup> ratio in the external solution [-] | $\kappa$ -total [mS cm <sup>-1</sup> ] |        |        |         |
|           |                                           |                                                              | Exp.                                   | f(Na)  | f(H)   | f(H/Na) |
| Nafion117 | 0.1                                       | 0                                                            | 12.56                                  | 25.17  | 25.87  | 25.52   |
|           |                                           | 0.1                                                          | 13.89                                  | 17.85  | 17.83  | 17.84   |
|           |                                           | 0.3                                                          | 16.54                                  | 27.53  | 27.87  | 27.70   |
|           |                                           | 0.5                                                          | 22.15                                  | 42.89  | 44.00  | 43.44   |
|           |                                           | 0.75                                                         | 30.22                                  | 65.87  | 68.16  | 67.00   |
|           |                                           | 1.0                                                          | 45.75                                  | 110.66 | 116.38 | 113.48  |
|           | 0.5                                       | 0                                                            | 14.21                                  | 25.91  | 24.61  | 25.25   |
|           |                                           | 0.1                                                          | 18.68                                  | 23.52  | 22.02  | 22.76   |
|           |                                           | 0.3                                                          | 23.04                                  | 27.51  | 25.65  | 26.57   |
|           |                                           | 0.5                                                          | 27.33                                  | 40.73  | 38.32  | 39.51   |
|           |                                           | 0.75                                                         | 53.77                                  | 71.88  | 68.50  | 70.17   |
|           |                                           | 1.0                                                          | 98.20                                  | 145.87 | 142.37 | 144.11  |
|           | 1.0                                       | 0                                                            | 15.15                                  | 28.08  | 26.04  | 27.04   |
|           |                                           | 0.1                                                          | 21.18                                  | 21.80  | 19.69  | 20.72   |
|           |                                           | 0.3                                                          | 26.10                                  | 28.43  | 25.70  | 27.03   |
|           |                                           | 0.5                                                          | 33.60                                  | 38.26  | 34.69  | 36.43   |
|           |                                           | 0.75                                                         | 60.40                                  | 69.02  | 63.28  | 66.09   |
|           |                                           | 1.0                                                          | 116.86                                 | 116.81 | 108.18 | 112.42  |

**Table S5.** The numerical results of CEMs' total conductivity under mixed MgSO<sub>4</sub> + Na<sub>2</sub>SO<sub>4</sub> electrolytes of different total sulfate concentration. The inter-gel phase conductivity ( $\kappa^{in}$ ) values are obtained from the conductivity data analyzed in the OLI Studio.

| Membrane | SO <sub>4</sub> <sup>2-</sup> Con.<br>[M] | Equivalent Mg <sup>2+</sup> ratio in the external solution [-] | $\kappa$ -total [mS cm <sup>-1</sup> ] |       |       |          |
|----------|-------------------------------------------|----------------------------------------------------------------|----------------------------------------|-------|-------|----------|
|          |                                           |                                                                | Exp.                                   | f(Na) | f(Mg) | f(Mg/Na) |
| 3361BW   | 0.1                                       | 0                                                              | 12.36                                  | 10.79 | 12.62 | 11.67    |
|          |                                           | 0.1                                                            | 10.23                                  | 8.85  | 10.09 | 9.45     |
|          |                                           | 0.3                                                            | 8.05                                   | 6.48  | 7.34  | 6.89     |
|          |                                           | 0.5                                                            | 6.46                                   | 4.87  | 5.39  | 5.12     |
|          |                                           | 0.75                                                           | 5.24                                   | 4.27  | 4.74  | 4.50     |
|          |                                           | 1.0                                                            | 4.37                                   | 3.02  | 4.20  | 3.57     |
|          | 0.5                                       | 0                                                              | 16.98                                  | 16.87 | 16.42 | 16.64    |
|          |                                           | 0.1                                                            | 16.17                                  | -     | -     | -        |
|          |                                           | 0.3                                                            | 15.19                                  | 12.60 | 12.62 | 12.61    |
|          |                                           | 0.5                                                            | 12.49                                  | 9.29  | 9.30  | 9.29     |
|          |                                           | 0.75                                                           | 8.79                                   | 5.75  | 5.63  | 5.69     |
|          |                                           | 1.0                                                            | 7.00                                   | 5.97  | 6.01  | 5.99     |
|          | 1.0                                       | 0                                                              | 20.74                                  | 21.28 | 20.12 | 20.70    |
|          |                                           | 0.1                                                            | 18.98                                  | 0.00  | 0.00  | 0.00     |
|          |                                           | 0.3                                                            | 18.71                                  | 16.51 | 15.87 | 16.19    |

|           |                                           | 0.5                                                            | 15.54                                  | 12.35 | 11.88 | 12.12    |
|-----------|-------------------------------------------|----------------------------------------------------------------|----------------------------------------|-------|-------|----------|
|           |                                           | 0.75                                                           | 11.22                                  | 7.70  | 7.32  | 7.51     |
|           |                                           | 1.0                                                            | 8.28                                   | 7.31  | 7.13  | 7.22     |
| Membrane  | SO <sub>4</sub> <sup>2-</sup> Con.<br>[M] | Equivalent Mg <sup>2+</sup> ratio in the external solution [-] | $\kappa$ -total [mS cm <sup>-1</sup> ] |       |       |          |
|           |                                           |                                                                | Exp.                                   | f(Na) | f(Mg) | f(Mg/Na) |
| CSE       | 0.1                                       | 0                                                              | 8.07                                   | 8.60  | 9.55  | 9.07     |
|           |                                           | 0.1                                                            | 5.64                                   | 5.68  | 6.38  | 6.02     |
|           |                                           | 0.3                                                            | 3.82                                   | 3.59  | 3.77  | 3.68     |
|           |                                           | 0.5                                                            | 3.04                                   | 2.55  | 2.73  | 2.64     |
|           |                                           | 0.75                                                           | 2.51                                   | 2.21  | 2.44  | 2.32     |
|           |                                           | 1.0                                                            | 2.07                                   | 1.80  | 2.38  | 2.07     |
|           | 0.5                                       | 0                                                              | 10.00                                  | 11.07 | 11.41 | 11.24    |
|           |                                           | 0.1                                                            | 9.22                                   | 9.74  | 9.93  | 9.83     |
|           |                                           | 0.3                                                            | 7.07                                   | 6.81  | 6.88  | 6.84     |
|           |                                           | 0.5                                                            | 5.42                                   | 4.69  | 4.71  | 4.70     |
|           |                                           | 0.75                                                           | 3.97                                   | 2.92  | 2.90  | 2.91     |
|           |                                           | 1.0                                                            | 2.88                                   | 2.81  | 2.94  | 2.88     |
|           | 1.0                                       | 0                                                              | 11.34                                  | 12.84 | 12.64 | 12.74    |
|           |                                           | 0.1                                                            | 9.75                                   | 10.67 | 10.26 | 10.47    |
|           |                                           | 0.3                                                            | 8.52                                   | 8.44  | 8.22  | 8.33     |
|           |                                           | 0.5                                                            | 6.54                                   | 5.84  | 5.66  | 5.75     |
|           |                                           | 0.75                                                           | 4.50                                   | 3.42  | 3.25  | 3.33     |
|           |                                           | 1.0                                                            | 2.81                                   | 2.87  | 2.75  | 2.81     |
| Membrane  | SO <sub>4</sub> <sup>2-</sup> Con.<br>[M] | Equivalent Mg <sup>2+</sup> ratio in the external solution [-] | $\kappa$ -total [mS cm <sup>-1</sup> ] |       |       |          |
|           |                                           |                                                                | Exp.                                   | f(Na) | f(Mg) | f(Mg/Na) |
| Nafion117 | 0.1                                       | 0                                                              | 17.19                                  | 20.08 | 17.81 | 18.91    |
|           |                                           | 0.1                                                            | 14.98                                  | 16.66 | 14.99 | 15.81    |
|           |                                           | 0.3                                                            | 12.11                                  | 12.31 | 11.18 | 11.74    |
|           |                                           | 0.5                                                            | 10.66                                  | 9.88  | 9.06  | 9.46     |
|           |                                           | 0.75                                                           | 9.00                                   | 8.82  | 8.11  | 8.46     |
|           |                                           | 1.0                                                            | 7.86                                   | 8.23  | 7.49  | 7.85     |
|           | 0.5                                       | 0                                                              | 21.70                                  | 24.18 | 23.64 | 23.91    |
|           |                                           | 0.1                                                            | 20.97                                  | -     | -     | -        |
|           |                                           | 0.3                                                            | 18.78                                  | 18.59 | 17.97 | 18.28    |
|           |                                           | 0.5                                                            | 16.56                                  | 14.98 | 14.42 | 14.70    |
|           |                                           | 0.75                                                           | 13.08                                  | 10.29 | 9.99  | 10.13    |
|           |                                           | 1.0                                                            | 10.09                                  | 10.26 | 9.92  | 10.09    |
|           | 1.0                                       | 0                                                              | 19.98                                  | 21.37 | 21.69 | 21.53    |
|           |                                           | 0.1                                                            | 19.99                                  | 20.41 | 20.59 | 20.50    |
|           |                                           | 0.3                                                            | 19.33                                  | 18.28 | 18.18 | 18.23    |
|           |                                           | 0.5                                                            | 17.67                                  | 15.34 | 15.15 | 15.25    |
|           |                                           | 0.75                                                           | 14.82                                  | 11.40 | 11.26 | 11.33    |
|           |                                           | 1.0                                                            | 10.62                                  | 10.48 | 10.31 | 10.40    |

**Table S6.** The numerical results of CEMs' total conductivity under mixed H<sub>2</sub>SO<sub>4</sub> + Na<sub>2</sub>SO<sub>4</sub> electrolytes of different total sulfate concentration. The inter-gel phase conductivity ( $\kappa^{in}$ ) values are obtained from the conductivity data analyzed in the OLI Studio.

| Membrane | SO <sub>4</sub> <sup>2-</sup> Con.<br>[M] | Equivalent H <sup>+</sup> ratio in the external solution [-] | $\kappa$ -total [mS cm <sup>-1</sup> ] |       |       |         |
|----------|-------------------------------------------|--------------------------------------------------------------|----------------------------------------|-------|-------|---------|
|          |                                           |                                                              | Exp.                                   | f(Na) | f(H)  | f(H/Na) |
| 3361BW   | 0.1                                       | 0                                                            | 12.56                                  | 13.07 | 10.77 | 11.87   |



|           |                                           | 0.1                                                          | 13.89                                  | 0.00   | 0.00   | 0.00    |
|-----------|-------------------------------------------|--------------------------------------------------------------|----------------------------------------|--------|--------|---------|
|           |                                           | 0.3                                                          | 16.54                                  | 14.16  | 12.52  | 13.32   |
|           |                                           | 0.5                                                          | 22.15                                  | 19.95  | 16.93  | 18.38   |
|           |                                           | 0.75                                                         | 30.22                                  | 25.83  | 19.59  | 22.50   |
|           |                                           | 1.0                                                          | 45.75                                  | 46.75  | 37.02  | 41.60   |
|           | 0.5                                       | 0                                                            | 14.21                                  | 16.02  | 15.63  | 15.82   |
|           |                                           | 0.1                                                          | 18.68                                  | 0.00   | 0.00   | 0.00    |
|           |                                           | 0.3                                                          | 23.04                                  | 21.14  | 19.89  | 20.50   |
|           |                                           | 0.5                                                          | 27.33                                  | 24.93  | 22.63  | 23.75   |
|           |                                           | 0.75                                                         | 53.77                                  | 51.40  | 46.50  | 48.89   |
|           |                                           | 1.0                                                          | 98.20                                  | 105.46 | 92.90  | 98.98   |
|           | 1.0                                       | 0                                                            | 15.15                                  | 18.34  | 20.87  | 19.56   |
|           |                                           | 0.1                                                          | 21.18                                  | 0.00   | 0.00   | 0.00    |
|           |                                           | 0.3                                                          | 26.10                                  | 25.96  | 26.09  | 26.03   |
|           |                                           | 0.5                                                          | 33.60                                  | 31.64  | 31.38  | 31.51   |
|           |                                           | 0.75                                                         | 60.40                                  | 56.96  | 55.59  | 56.27   |
|           |                                           | 1.0                                                          | 116.86                                 | 131.11 | 126.78 | 128.92  |
| Membrane  | SO <sub>4</sub> <sup>2-</sup> Con.<br>[M] | Equivalent H <sup>+</sup> ratio in the external solution [-] | $\kappa$ -total [mS cm <sup>-1</sup> ] |        |        |         |
|           |                                           |                                                              | Exp.                                   | f(Na)  | f(H)   | f(H/Na) |
| CSE       | 0.1                                       | 0                                                            | 7.25                                   | 7.87   | 8.69   | 8.27    |
|           |                                           | 0.1                                                          | 8.22                                   | 6.13   | 6.24   | 6.18    |
|           |                                           | 0.3                                                          | 11.53                                  | 9.91   | 10.78  | 10.34   |
|           |                                           | 0.5                                                          | 16.00                                  | 14.80  | 16.35  | 15.56   |
|           |                                           | 0.75                                                         | 23.30                                  | 23.54  | 24.65  | 24.09   |
|           |                                           | 1.0                                                          | 35.41                                  | 37.67  | 43.25  | 40.36   |
|           | 0.5                                       | 0                                                            | 10.42                                  | 11.87  | 11.88  | 11.88   |
|           |                                           | 0.1                                                          | 11.31                                  | 10.25  | 9.86   | 10.06   |
|           |                                           | 0.3                                                          | 14.12                                  | 12.85  | 12.58  | 12.71   |
|           |                                           | 0.5                                                          | 19.52                                  | 18.20  | 19.07  | 18.63   |
|           |                                           | 0.75                                                         | 37.03                                  | 36.82  | 38.00  | 37.40   |
|           |                                           | 1.0                                                          | 61.84                                  | 67.79  | 73.27  | 70.48   |
|           | 1.0                                       | 0                                                            | 9.82                                   | 11.22  | 11.17  | 11.19   |
|           |                                           | 0.1                                                          | 11.65                                  | 11.49  | 11.41  | 11.45   |
|           |                                           | 0.3                                                          | 14.56                                  | 13.46  | 13.32  | 13.39   |
|           |                                           | 0.5                                                          | 20.01                                  | 18.87  | 18.95  | 18.91   |
|           |                                           | 0.75                                                         | 39.65                                  | 39.32  | 40.15  | 39.73   |
|           |                                           | 1.0                                                          | 63.29                                  | 72.78  | 71.48  | 72.13   |
| Membrane  | SO <sub>4</sub> <sup>2-</sup> Con.<br>[M] | Equivalent H <sup>+</sup> ratio in the external solution [-] | $\kappa$ -total [mS cm <sup>-1</sup> ] |        |        |         |
|           |                                           |                                                              | Exp.                                   | f(Na)  | f(H)   | f(H/Na) |
| Nafion117 | 0.1                                       | 0                                                            | 14.83                                  | 20.38  | 22.93  | 21.62   |
|           |                                           | 0.1                                                          | 17.10                                  | 14.63  | 15.76  | 15.19   |
|           |                                           | 0.3                                                          | 21.28                                  | 22.32  | 24.59  | 23.43   |
|           |                                           | 0.5                                                          | 28.51                                  | 33.83  | 38.34  | 36.01   |
|           |                                           | 0.75                                                         | 42.00                                  | 53.63  | 60.76  | 57.08   |
|           |                                           | 1.0                                                          | 66.28                                  | 93.27  | 106.55 | 99.69   |
|           | 0.5                                       | 0                                                            | 17.96                                  | 20.91  | 21.19  | 21.05   |
|           |                                           | 0.1                                                          | 20.68                                  | 16.73  | 17.46  | 17.09   |
|           |                                           | 0.3                                                          | 22.71                                  | 20.99  | 21.20  | 21.10   |
|           |                                           | 0.5                                                          | 31.93                                  | 31.38  | 31.97  | 31.68   |
|           |                                           | 0.75                                                         | 51.04                                  | 55.28  | 57.33  | 56.29   |
|           |                                           | 1.0                                                          | 87.76                                  | 111.74 | 119.83 | 115.71  |
|           | 1.0                                       | 0                                                            | 20.07                                  | 22.38  | 22.07  | 22.22   |
|           |                                           | 0.1                                                          | 20.64                                  | 16.83  | 16.22  | 16.52   |

|  |      |       |       |       |       |
|--|------|-------|-------|-------|-------|
|  | 0.3  | 26.42 | 22.26 | 21.37 | 21.81 |
|  | 0.5  | 33.11 | 29.67 | 28.69 | 29.18 |
|  | 0.75 | 57.80 | 56.11 | 54.10 | 55.10 |
|  | 1.0  | 87.21 | 95.50 | 93.12 | 94.30 |

**Table S7.** The numerical fitting results of the correlation between  $\kappa^g$  and  $\sigma$  for CEMs in mixed  $\text{MgSO}_4 + \text{Na}_2\text{SO}_4$  electrolytes, according to Equation 6.

| Membranes | Sulfate concentration [M] | $\sigma$<br>[-] | $R^2$<br>[-] |
|-----------|---------------------------|-----------------|--------------|
| 3361BW    | 0.1                       | 14.497          | 0.900        |
|           | 0.5                       | -3.780          | 0.995        |
|           | 1.0                       | -2.017          | 0.999        |
| CSE       | 0.1                       | 5.219           | 0.972        |
|           | 0.5                       | 4.086           | 0.988        |
|           | 1.0                       | 3.514           | 0.972        |
| Nafion117 | 0.1                       | 6.276           | 0.999        |
|           | 0.5                       | 0.751           | 0.999        |
|           | 1.0                       | -6.409          | 0.995        |

**Table S8.** The numerical fitting results of the correlation between  $\kappa^g$  and  $\sigma$  for CEMs in mixed  $\text{H}_2\text{SO}_4 + \text{Na}_2\text{SO}_4$  electrolytes, according to Equation 6.

| Membranes | Sulfate concentration [M] | $\sigma$<br>[-] | $R^2$<br>[-] |
|-----------|---------------------------|-----------------|--------------|
| 3361BW    | 0.1                       | -33.601         | 0.975        |
|           | 0.5                       | -21.728         | 0.987        |
|           | 1.0                       | -23.994         | 0.999        |
| CSE       | 0.1                       | 6.937           | 0.976        |
|           | 0.5                       | 11.720          | 0.981        |
|           | 1.0                       | -4.427          | 0.976        |
| Nafion117 | 0.1                       | 37.128          | 0.994        |
|           | 0.5                       | 55.350          | 0.994        |
|           | 1.0                       | 22.154          | 0.974        |

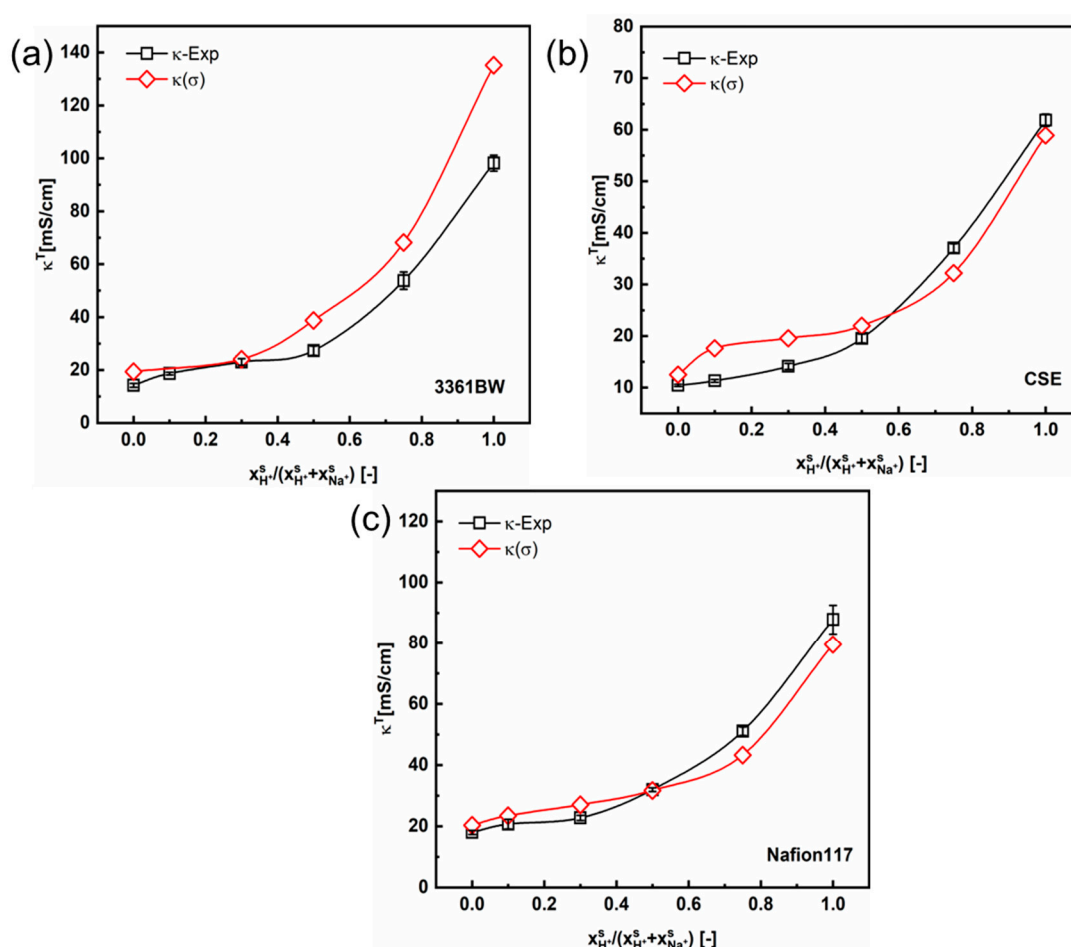

**Figure S3.** The variation of the experimental and the predicted total membrane conductivities with the cation composition of the mixed external  $H_2SO_4 + Na_2SO_4$  electrolytes (total sulfate concentration 0.5 M). The gel phase conductivity ( $\kappa^g$ ) of the CEMs is obtained from the nonlinear correlation method considering the interaction parameter ( $\alpha$ ).
